# Supplementary material
Source: Springer Nature journal article supplement (https://www.springermedizin.de/resource/supplementary/13054_2013_2097_MOESM4_ESM.pdf/9711606)

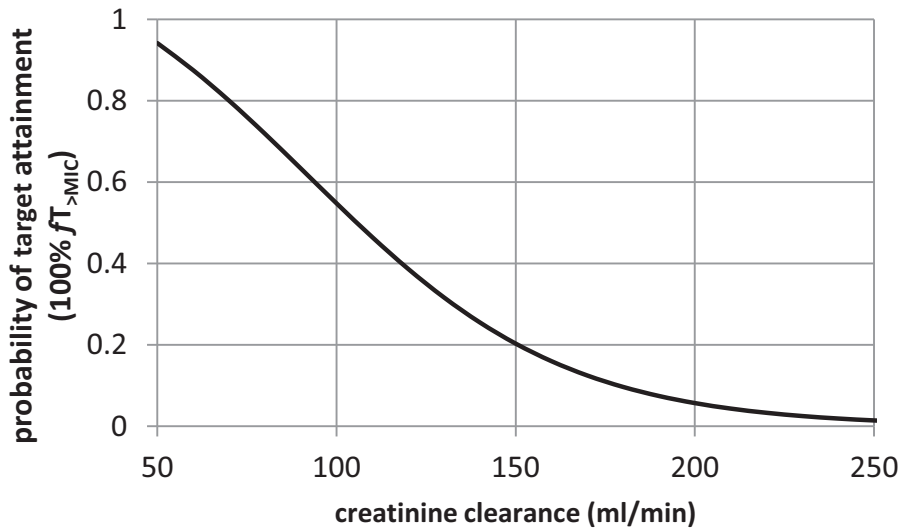

Supplement: MOESM4 [file 9711606]
